# Supplementary material for: Polypyrrole-derived mesoporous nitrogen-doped carbons with intrinsic catalytic activity in the oxygen reduction reaction
Source: Royal Society of Chemistry journal article supplement (doi:10.1039/c3ra41719k), 2013-01-01
Supplement: c3ra41719k.pdf [file c3ra41719k.pdf]

## SUPPORTING INFORMATION

### **Polypyrrole-derived Mesoporous Nitrogen-doped Carbons with Intrinsic Catalytic Activity in the Oxygen Reduction Reaction**

Marta Sevilla,\*<sup>a</sup> Linghui Yu,<sup>b</sup> Tim Fellinger,<sup>b</sup> Antonio B. Fuertes<sup>a</sup> and Maria-Magdalena Titirici<sup>c</sup>

<sup>a</sup> *Instituto Nacional del Carbón (CSIC), P.O. Box 73, Oviedo 33080, Spain*

<sup>b</sup> *Max-Planck Institute of Colloids and Interfaces, Am Muhlenberg 1, 14476, Potsdam, Germany*

<sup>c</sup> *Queen Mary University of London, School of Engineering and Materials Science, Mile End Road, E1 4NS, London*

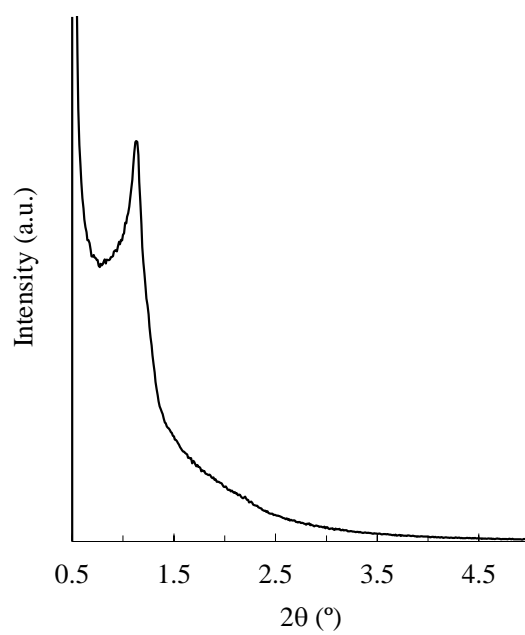

**Figure S1.** XRD pattern in the low-angle region of the CS900 sample.

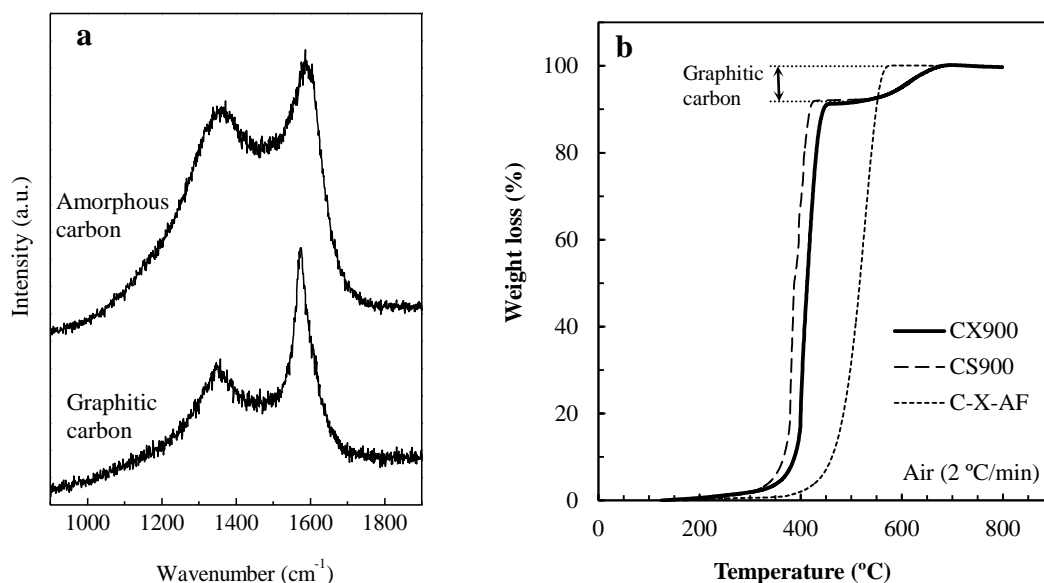

**Figure S2.** a) Raman spectra of graphitized and amorphous carbon regions of CX900, and b) thermogravimetric analysis of the N-doped mesoporous carbons CX900 and CS900. A templated mesoporous carbon prepared using SBA-15 as template and furfuryl alcohol as carbon precursor (C-X-AF) was employed for comparison in Fig. S2. This thermogravimetric analysis reveals that the N-doped mesoporous carbons contain no iron residue which may catalyze the ORR reaction.

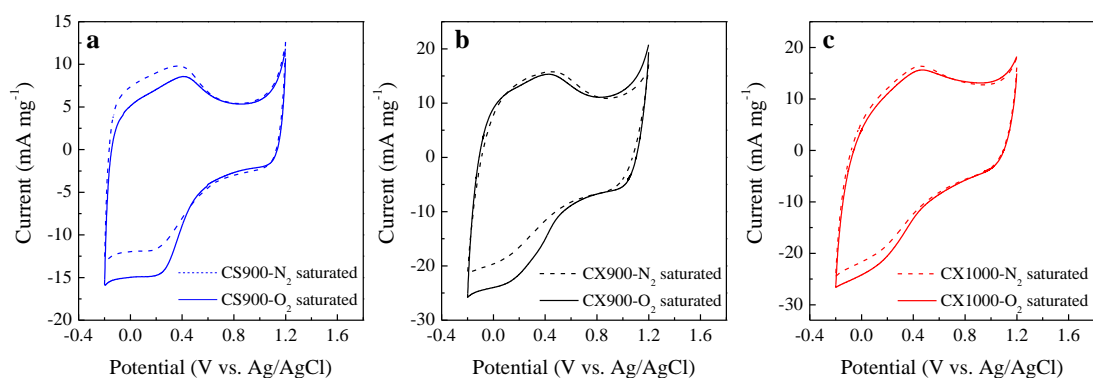

**Figure S3.** Cyclic voltammograms of the N-doped mesoporous carbons at a scan rate of 50 mV s<sup>-1</sup> in 0.05 M H<sub>2</sub>SO<sub>4</sub>. a) CS900, b) CX900, and c) CX1000.

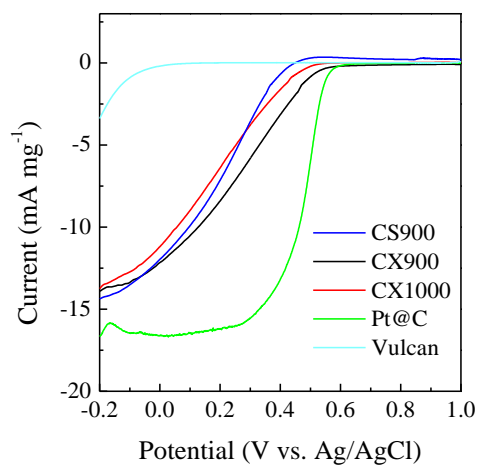

**Figure S4.** RDE polarization curves of the N-doped mesoporous carbons, Vulcan, and 20 wt% Pt@C in 0.05 M H<sub>2</sub>SO<sub>4</sub> at a constant rotation rate of 1600 rpm.
